# Supplementary material for: Enhanced catalytic performance for metathesis reactions over ordered tungsten and aluminum co-doped mesoporous KIT-6 catalysts
Source: Royal Society of Chemistry journal article supplement (doi:10.1039/c5nj01415h), 2015-01-01
Supplement: c5nj01415h1.pdf [file c5nj01415h1.pdf]

## Supporting information

### Enhanced Catalytic Performance for Metathesis Reactions over Ordered Tungsten and Aluminum Co-doped Mesoporous KIT-6 Catalysts

Huan Liu,<sup>a,b</sup> Kai Tao,<sup>a,\*</sup> Peipei Zhang,<sup>a</sup> Wei Xu,<sup>a</sup> Shenghu Zhou,<sup>a,\*</sup>

<sup>a</sup>Ningbo Institute of Materials Technology and Engineering, Chinese Academy of  
Sciences, Ningbo, Zhejiang 315201, China

<sup>b</sup>Shanghai Key Laboratory of Atmospheric Particle Pollution and Prevention (LAP<sup>3</sup>),  
Department of Environmental Science and Engineering, Fudan University, Shanghai  
200433, China

#### \*Corresponding authors

Tel.: (+86) 574 86696927

Fax: (+86) 574 86685043

E-mail: zhoush@nimte.ac.cn (S. Z.); taokai@nimte.ac.cn (K. T.)

Table S1. Binding energies and molar percentages of  $W^{5+}$  and  $W^{6+}$  species in W-KIT-6 and W-Al-KIT-6-10 samples.

| Catalysts     | Binding energies for $W_{4f}$ (eV) |                   |                   |                   | Atomic cont. |              |
|---------------|------------------------------------|-------------------|-------------------|-------------------|--------------|--------------|
|               | $W^{6+} 4f_{5/2}$                  | $W^{6+} 4f_{7/2}$ | $W^{5+} 4f_{5/2}$ | $W^{5+} 4f_{7/2}$ | $W^{5+}$ (%) | $W^{6+}$ (%) |
| W-KIT-6       | 38.0                               | 35.9              | 37.3              | 35.2              | 20.6         | 79.4         |
| W-Al-KIT-6-10 | 38.3                               | 36.2              | 37.0              | 34.9              | 37.5         | 62.5         |

10

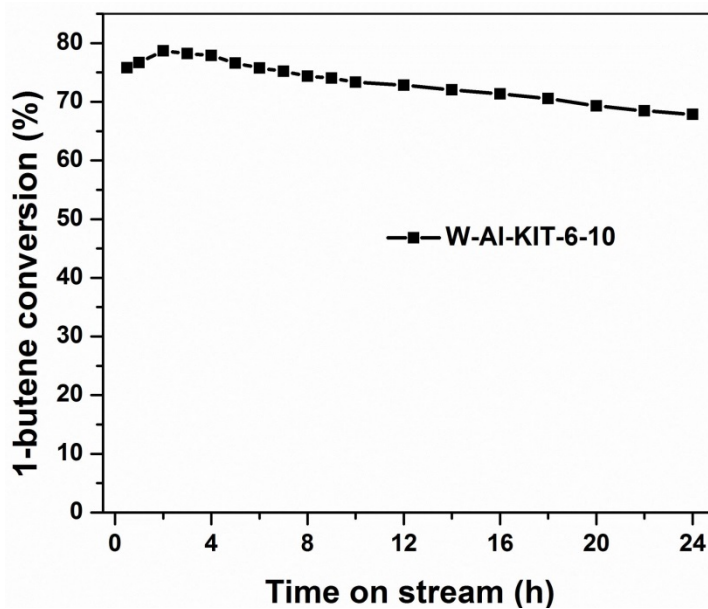

**Figure S1** Time-on-stream 1-butene conversion of W-Al-KIT-6-10 catalyst. Reaction conditions: catalyst weight-1.0 g; T=450 °C; P=0.1 MPa; WHSV=0.8 h<sup>-1</sup>; C<sub>2</sub>H<sub>4</sub>/1-C<sub>4</sub>H<sub>8</sub>=2.

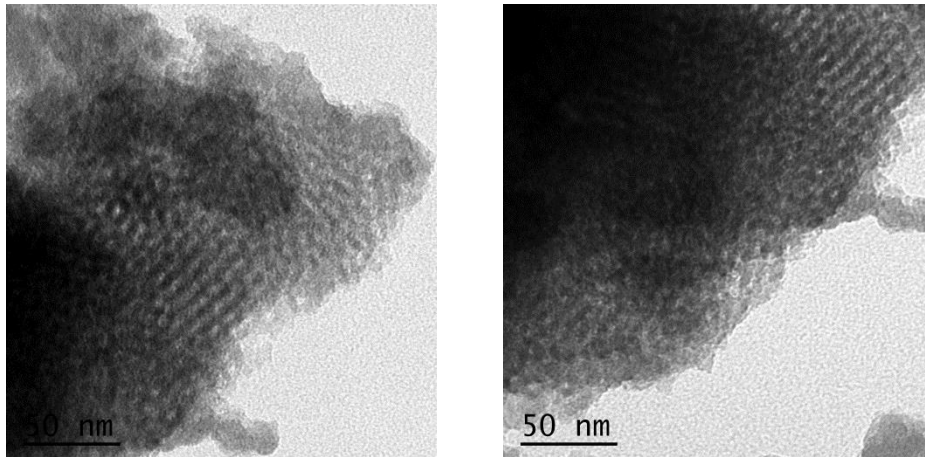

**Figure S2** TEM images of spent W-Al-KIT-6 catalyst at different locations.
